# Supplementary material
Source: Research Square preprint supplement (doi:10.21203/rs.3.rs-10006350/v1)
Supplement: Supplementary file 1 [file a099663066ead3200189fd0e.docx]

Supporting information


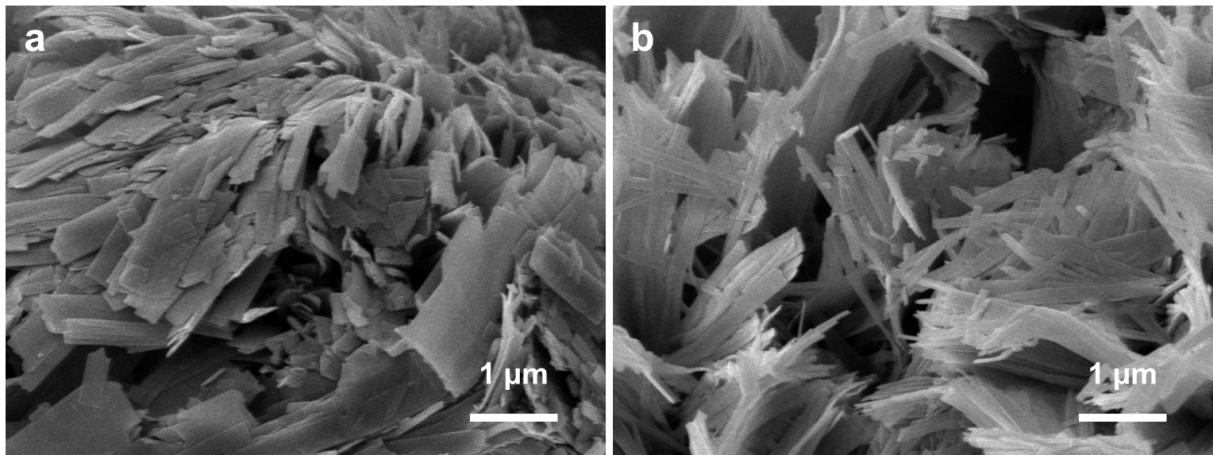


Fig. S1 SEM images of pristine NVO (a) and ANVO (b).


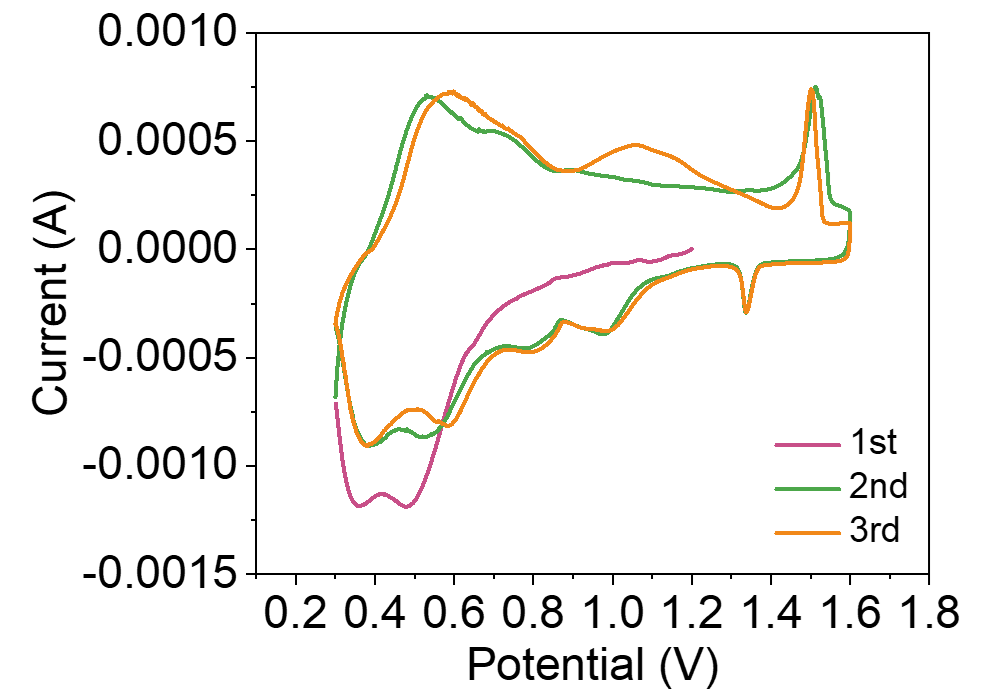


Fig. S2. The first three consecutive CV profiles of ANVO cathode in 0.3-1.6 V potential window.
